# Supplementary material for: Genome-wide association mapping of Fusarium crown rot resistance in Aegilops tauschii
Source: Front Plant Sci. 2022 Sep 30;13:998622. doi: 10.3389/fpls.2022.998622 (PMC9562832; doi:10.3389/fpls.2022.998622)
Supplement: Supplementary Table 1 — Detail information and phenotypic data of 286 Aegilops tauschii accessions used in this study. [file Table_1.xlsx]

## Sheet: Table S1
Table S1 Detail information and phenotypic data of 286 Aegilops tauschii accessions used in this study.
Genotype ID	Accession ID	Origin	Morphological classification	Grouping base on STRUCTURE	Haplotype	FCR severity	Disease index
L001	AS623054	Armenia	Ae. tauschii ssp. strangulata	S-group	ACGATC	1.6	32.03
L002	AS623310	Georgia	Ae. tauschii ssp. strangulata	S-group	ACGATC	2.68	53.56
L003	AS623322	Azerbaijan	Ae. tauschii ssp. strangulata	S-group	ACGATC	1.75	34.93
L004	AS623125	Azerbaijan	Ae. tauschii ssp. strangulata	S-group	ACGATC	1.65	33.05
L005	AS623142	Afghanistan	Ae. tauschii ssp. strangulata	S-group	ACGATC	1.26	25.11
L006	AS623143	Azerbaijan	Ae. tauschii ssp. strangulata	S-group	ACGATC	1.62	32.34
L007	AS623241	Azerbaijan	Ae. tauschii ssp. strangulata	S-group	ACGATC	1.71	34.18
L008	AS623245	Azerbaijan	Ae. tauschii ssp. strangulata	S-group	ACGATC	1.7	33.95
L009	AS623326	Azerbaijan	Ae. tauschii ssp. strangulata	S-group	ACGATC	1.56	31.28
L010	AS623306	Turkey	Ae. tauschii ssp. strangulata	S-group	ACGATC	1.7	33.94
L011	AS623127	Azerbaijan	Ae. tauschii ssp. strangulata	S-group	ACGATC	1.54	30.71
L012	AS623137	Azerbaijan	Ae. tauschii ssp. strangulata	S-group	ACAATC	1.87	37.41
L013	AS623330	Azerbaijan	Ae. tauschii ssp. strangulata	S-group	ACGATC	1.86	37.26
L014	AS623150	Azerbaijan	Ae. tauschii ssp. strangulata	S-group	ACGATC	2.12	42.47
L015	AS623325	-	Ae. tauschii ssp. strangulata	S-group	ACGATC	2.36	47.19
L016	AS623134	Azerbaijan	Ae. tauschii ssp. strangulata	S-group	ACGATC	1.63	32.48
L017	AS623136	Afghanistan	Ae. tauschii ssp. strangulata	S-group	ACGATC	1.89	37.81
L018	AS623051	Turkmenistan	Ae. tauschii ssp. strangulata	S-group	ACGATC	2.62	52.49
L019	AS623151	Azerbaijan	Ae. tauschii ssp. strangulata	S-group	ACGATC	1.45	28.95
L020	AS623324	Azerbaijan	Ae. tauschii ssp. strangulata	S-group	ACGATC	1.6	32.06
L021	AS623244	Russian	Ae. tauschii ssp. strangulata	S-group	ACGATC	1.57	31.37
L022	AS623318	Russian	Ae. tauschii ssp. strangulata	S-group	ACGATC	2.36	47.23
L023	AS623024	China	Ae. tauschii ssp. strangulata	S-group	ACGATC	1.79	35.87
L024	AS623250	Turkey	Ae. tauschii ssp. strangulata	S-group	ACGATC	1.61	32.13
L025	AS623141	Azerbaijan	Ae. tauschii ssp. strangulata	S-group	ACGATC	1.59	31.81
L026	AS623140	Azerbaijan	Ae. tauschii ssp. strangulata	S-group	ACGATC	2.1	41.96
L027	AS623251	Turkey	Ae. tauschii ssp. strangulata	S-group	ACGATC	2.31	46.12
L028	AS623252	Turkey	Ae. tauschii ssp. strangulata	S-group	ACGATC	1.21	24.25
L029	AS623178	Azerbaijan	Ae. tauschii ssp. strangulata	S-group	ACAATC	1.64	32.88
L030	AS623333	Azerbaijan	Ae. tauschii ssp. strangulata	S-group	ACGATC	1.99	39.82
L031	AS623282	Turkey	Ae. tauschii ssp. strangulata	S-group	ACGATC	2.22	44.5
L032	AS623332	Azerbaijan	Ae. tauschii ssp. strangulata	S-group	ACGATC	1.66	33.26
L033	AS623243	Azerbaijan	Ae. tauschii ssp. strangulata	S-group	ACAATC	1.57	31.41
L034	AS623177	Azerbaijan	Ae. tauschii ssp. strangulata	S-group	ACAATC	1.41	28.08
L035	AS623174	Iran	Ae. tauschii ssp. strangulata	S-group	ACGATC	1.83	36.5
L036	AS623308	Azerbaijan	Ae. tauschii ssp. strangulata	S-group	ACGATC	1.45	28.95
L037	AS623153	Armenia	Ae. tauschii ssp. strangulata	S-group	ACGATC	2.71	54.21
L038	AS623117	Iran	Ae. tauschii ssp. strangulata	S-group	ACGATC	1.99	39.72
L039	AS623276	Iran	Ae. tauschii ssp. strangulata	S-group	ACGATC	1.83	36.5
L040	AS623277	Iran	Ae. tauschii ssp. strangulata	S-group	ACGATC	1.69	33.87
L041	AS623208	Iran	Ae. tauschii ssp. strangulata	S-group	ACGATC	2.6	52.1
L042	AS623339	Iran	Ae. tauschii ssp. strangulata	S-group	ACGATC	2.05	40.99
L043	AS623272	Iran	Ae. tauschii ssp. strangulata	S-group	ACGATC	2.38	47.66
L044	AS623522	-	Ae. tauschii ssp. tauschii	S-group	ACGATC	1.72	34.54
L045	AS623247	Azerbaijan	Ae. tauschii ssp. strangulata	S-group	ACGATC	2.05	40.95
L046	AS623329	Turkmenistan	Ae. tauschii ssp. strangulata	S-group	ACGATC	1.63	32.64
L047	AS623246	Turkmenistan	Ae. tauschii ssp. strangulata	S-group	ACGATC	2.23	44.59
L048	AS623520	-	Ae. tauschii ssp. strangulata	S-group	ACGATC	1.35	26.91
L049	AS623323	Azerbaijan	Ae. tauschii ssp. strangulata	S-group	ACGATC	2.3	46.04
L050	AS623328	Azerbaijan	Ae. tauschii ssp. strangulata	S-group	ACGATC	2.03	40.6
L051	AS623209	Iran	Ae. tauschii ssp. strangulata	S-group	ACGATC	2.19	43.78
L052	AS623179	-	Ae. tauschii ssp. strangulata	S-group	ACGATC	1.98	39.54
L053	AS623335	Turkmenistan	Ae. tauschii ssp. strangulata	S-group	ACGATC	1.59	31.81
L054	AS623107	Iran	Ae. tauschii ssp. strangulata	S-group	ACGATC	1.81	36.13
L055	AS623232	Iran	Ae. tauschii ssp. strangulata	S-group	ACGATC	2.31	46.07
L056	AS623037	-	Ae. tauschii ssp. strangulata	S-group	ACGATC	2.19	43.83
L057	AS623166	-	Ae. tauschii ssp. strangulata	S-group	ACGATC	1.72	34.3
L058	AS623320	Iran	Ae. tauschii ssp. strangulata	S-group	ACGATC	2.46	49.25
L059	AS623167	Azerbaijan	Ae. tauschii ssp. strangulata	S-group	ACGATC	1.85	37.05
L060	AS623044	-	Ae. tauschii ssp. strangulata	S-group	ACGATC	1.55	30.92
L061	AS623006	-	Ae. tauschii ssp. strangulata	S-group	ACGATC	1.61	32.21
L062	AS623280	Iran	Ae. tauschii ssp. strangulata	S-group	ACGATC	2.54	50.69
L063	AS623183	Iran	Ae. tauschii ssp. strangulata	S-group	ACGATC	1.9	38.03
L064	AS623042	-	Ae. tauschii ssp. strangulata	S-group	ACGATC	1.78	35.68
L065	AS623049	-	Ae. tauschii ssp. strangulata	S-group	ACGATC	1.97	39.36
L066	AS623210	Iran	Ae. tauschii ssp. strangulata	S-group	ACGATC	2.51	50.1
L067	AS623094	Iran	Ae. tauschii ssp. strangulata	S-group	ACGATC	1.9	37.96
L068	AS623317	Iran	Ae. tauschii ssp. strangulata	S-group	ACGATC	1.63	32.54
L069	AS623041	-	Ae. tauschii ssp. strangulata	S-group	ACGATT	1.97	39.41
L070	AS623046	-	Ae. tauschii ssp. strangulata	S-group	ACGATT	1.58	31.5
L071	AS623170	-	Ae. tauschii ssp. strangulata	S-group	ACGATC	1.68	33.55
L072	AS623205	Iran	Ae. tauschii ssp. strangulata	S-group	ACAATC	1.51	30.16
L073	AS623040	-	Ae. tauschii ssp. strangulata	S-group	ACGATC	2.33	46.68
L074	AS623045	-	Ae. tauschii ssp. strangulata	S-group	ACGATC	2.5	49.97
L075	AS623319	Iran	Ae. tauschii ssp. strangulata	S-group	ACGATC	2.14	42.79
L076	AS623226	-	Ae. tauschii ssp. strangulata	S-group	ACGATT	1.39	27.85
L077	AS623340	Iran	Ae. tauschii ssp. strangulata	S-group	ACGATT	1.92	38.48
L078	AS623043	-	Ae. tauschii ssp. strangulata	S-group	ACGATC	1.6	31.86
L079	AS623007	-	Ae. tauschii ssp. strangulata	S-group	ACGATC	1.63	32.64
L080	AS623048	-	Ae. tauschii ssp. strangulata	S-group	ACGATC	1.92	38.33
L081	AS623201	Iran	Ae. tauschii ssp. strangulata	S-group	ACGATC	2.05	41
L082	AS623240	-	Ae. tauschii ssp. strangulata	S-group	ACGATC	2.19	43.68
L083	AS623279	Iran	Ae. tauschii ssp. strangulata	S-group	ACGATC	2	39.98
L084	AS623321	Iran	Ae. tauschii ssp. strangulata	S-group	ACGATC	2.36	47.24
L085	AS623089	Iran	Ae. tauschii ssp. strangulata	S-group	ACGATC	1.71	34.18
L086	AS623515	-	Ae. tauschii ssp. strangulata	S-group	ACGATC	1.49	29.91
L087	AS623034	Iran	Ae. tauschii ssp. strangulata	S-group	ACGATC	2.12	42.35
L088	AS623211	Iran	Ae. tauschii ssp. strangulata	S-group	ACGATC	2.08	41.71
L089	AS623095	Iran	Ae. tauschii ssp. strangulata	S-group	ACGATC	1.62	32.34
L090	AS623327	Azerbaijan	Ae. tauschii ssp. strangulata	S-group	ACGATC	1	20.04
L091	AS623203	Iran	Ae. tauschii ssp. strangulata	S-group	ACGATC	1.37	27.41
L092	AS623058	Iran	Ae. tauschii ssp. strangulata	S-group	ACGATC	1.16	23.11
L093	AS623281	Iran	Ae. tauschii ssp. strangulata	S-group	ACGATC	1.78	35.54
L094	AS623206	Iran	Ae. tauschii ssp. strangulata	S-group	ACGATC	1.55	30.92
L095	AS623212	Iran	Ae. tauschii ssp. strangulata	S-group	ACAATC	1.64	32.75
L096	AS623529	-	Ae. tauschii ssp. strangulata	S-group	ACAATC	1.42	28.37
L097	AS623099	Iran	Ae. tauschii ssp. strangulata	S-group	ACAATC	1.43	28.64
L098	AS623217	Iran	Ae. tauschii ssp. strangulata	S-group	ACAATC	2.46	49.14
L099	AS623214	Iran	Ae. tauschii ssp. strangulata	S-group	ACAATC	1.86	37.17
L100	AS623216	Iran	Ae. tauschii ssp. strangulata	S-group	ACAATC	1.73	34.59
L101	AS623101	Iran	Ae. tauschii ssp. strangulata	S-group	ACAATC	1.55	31.08
L102	AS623235	Iran	Ae. tauschii ssp. strangulata	S-group	ATGATC	1.47	29.47
L103	AS623262	France	Ae. tauschii ssp. strangulata	S-group	ATGATC	1.77	35.37
L104	AS623004	-	Ae. tauschii ssp. strangulata	S-group	ATGATC	2.12	42.47
L105	AS623187	Iran	Ae. tauschii ssp. strangulata	S-group	ACAATC	1.77	35.41
L106	AS623239	Azerbaijan	Ae. tauschii ssp. strangulata	S-group	ACGATC	1.65	32.95
L107	AS623346	Azerbaijan	Ae. tauschii ssp. strangulata	S-group	ACGATC	2.33	46.64
L108	AS623168	-	Ae. tauschii ssp. strangulata	S-group	ATGATC	1.76	35.1
L109	AS623343	Iran	Ae. tauschii ssp. strangulata	S-group	ATAATC	1.6	31.92
L110	AS623341	Iran	Ae. tauschii ssp. strangulata	S-group	ATAATC	2.04	40.69
L111	AS623184	-	Ae. tauschii ssp. strangulata	S-group	ATAATC	1.37	27.41
L112	AS623218	Iran	Ae. tauschii ssp. strangulata	S-group	ATGATC	1.53	30.63
L113	AS623105	Iran	Ae. tauschii ssp. strangulata	S-group	ATAATC	1.96	39.1
L114	AS623591	-	Ae. tauschii ssp. strangulata	S-group	ATAATC	1.41	28.26
L115	AS623118	Iran	Ae. tauschii ssp. strangulata	S-group	ATAATC	1.82	36.47
L116	AS623222	-	Ae. tauschii ssp. tauschii	T-group	ACGATC	2.14	42.79
L117	AS623145	Azerbaijan	Ae. tauschii ssp. tauschii	T-group	ACGATC	2.18	43.56
L118	AS623311	Russian	Ae. tauschii ssp. tauschii	T-group	GTGATT	1.26	25.26
L119	AS623638	-	Ae. tauschii ssp. tauschii	T-group	ACGATC	1.64	32.83
L120	AS623642	-	Ae. tauschii ssp. tauschii	T-group	ACAATC	1.39	27.69
L121	AS623157	-	Ae. tauschii ssp. tauschii	T-group	ACAATC	2.54	50.89
L122	AS623297	Turkey	Ae. tauschii ssp. tauschii	T-group	ATGATC	1.94	38.72
L123	AS623158	Armenia	Ae. tauschii ssp. tauschii	T-group	ACGATC	1.78	35.56
L124	AS623159	Georgia	Ae. tauschii ssp. tauschii	T-group	ACGATC	1.48	29.57
L125	AS623299	Turkey	Ae. tauschii ssp. tauschii	T-group	ATGATC	0.91	18.09
L126	AS623300	Turkey	Ae. tauschii ssp. tauschii	T-group	ATGATC	2.54	50.79
L127	AS623304	Turkey	Ae. tauschii ssp. tauschii	T-group	ACGATC	2.62	52.49
L128	AS623154	Armenia	Ae. tauschii ssp. tauschii	T-group	ATGATT	1.83	36.5
L129	AS623180	-	Ae. tauschii ssp. tauschii	T-group	GCGATC	1.27	25.47
L130	AS623258	Turkey	Ae. tauschii ssp. tauschii	T-group	ACGATC	2.07	41.37
L131	AS623305	-	Ae. tauschii ssp. tauschii	T-group	ATGATC	1.96	39.22
L132	AS623307	Turkey	Ae. tauschii ssp. tauschii	T-group	ACGATC	1.41	28.26
L133	AS623285	Turkey	Ae. tauschii ssp. tauschii	T-group	ACGATC	2.38	47.69
L134	AS623288	Turkey	Ae. tauschii ssp. tauschii	T-group	ACGATC	2.09	41.83
L135	AS623292	Turkey	Ae. tauschii ssp. tauschii	T-group	ACGATC	1.67	33.39
L136	AS623003	-	Ae. tauschii ssp. tauschii	T-group	ATGATC	1.27	25.4
L137	AS623298	Turkey	Ae. tauschii ssp. tauschii	T-group	ATGATC	1.42	28.44
L138	AS623295	-	Ae. tauschii ssp. tauschii	T-group	ATGATC	1.76	35.13
L139	AS623219	Iran	Ae. tauschii ssp. tauschii	T-group	ATGGCC	1.99	39.72
L140	AS623342	Iran	Ae. tauschii ssp. tauschii	T-group	ATGGCC	1.36	27.23
L141	AS623349	-	Ae. tauschii ssp. tauschii	T-group	ACGATC	2.28	45.61
L142	AS623294	Turkey	Ae. tauschii ssp. tauschii	T-group	ATGATC	1.98	39.51
L143	AS623296	-	Ae. tauschii ssp. tauschii	T-group	ATGATC	2.82	56.49
L144	AS623088	Iran	Ae. tauschii ssp. tauschii	T-group	ATAATC	2.46	49.14
L145	AS623057	Iran	Ae. tauschii ssp. tauschii	T-group	ATGATC	2.09	41.77
L146	AS623523	-	Ae. tauschii ssp. strangulata	T-group	ATGATC	1.8	36.03
L147	AS623473	-	Ae. tauschii ssp. tauschii	T-group	GTAATT	1.88	37.64
L148	AS623389	-	Ae. tauschii ssp. tauschii	T-group	ATAGCT	1.41	28.26
L149	AS623406	-	Ae. tauschii ssp. tauschii	T-group	GTGGCC	1.44	28.73
L150	AS623242	Turkmenistan	Ae. tauschii ssp. tauschii	T-group	ACGGCC	2.1	41.98
L151	AS623313	India	Ae. tauschii ssp. tauschii	T-group	GTGGCC	2.26	45.1
L152	AS623198	Afghanistan	Ae. tauschii ssp. tauschii	T-group	ATGATT	2.76	55.21
L153	AS623072	Afghanistan	Ae. tauschii ssp. tauschii	T-group	ATAATC	1.83	36.5
L154	AS623075	Afghanistan	Ae. tauschii ssp. tauschii	T-group	ACGATC	2.76	55.15
L155	AS623148	Afghanistan	Ae. tauschii ssp. tauschii	T-group	ATGATC	2.05	40.99
L156	AS623411	Uzbekistan	Ae. tauschii ssp. tauschii	T-group	ATAATT	1.73	34.59
L157	AS623271	Afghanistan	Ae. tauschii ssp. tauschii	T-group	ACAATC	2.21	44.25
L158	AS623012	China	Ae. tauschii ssp. tauschii	T-group	GCAATT	1.41	28.18
L159	AS623071	Afghanistan	Ae. tauschii ssp. tauschii	T-group	ACGATT	1.32	26.48
L160	AS623260	China	Ae. tauschii ssp. tauschii	T-group	GCAGCT	0.8	15.81
L161	AS623366	Tajikistan	Ae. tauschii ssp. tauschii	T-group	ATAATT	1.35	26.99
L162	AS623381	Pakistan	Ae. tauschii ssp. tauschii	T-group	ATAATT	1.8	36.03
L163	AS623398	Pakistan	Ae. tauschii ssp. tauschii	T-group	ATAATT	2.02	40.5
L164	AS623073	Afghanistan	Ae. tauschii ssp. tauschii	T-group	GCAATT	2.14	42.79
L165	AS623067	Afghanistan	Ae. tauschii ssp. tauschii	T-group	ACAATC	2.09	41.83
L166	AS623364	Tajikistan	Ae. tauschii ssp. tauschii	T-group	ACGATC	2.53	50.62
L167	AS623370	-	Ae. tauschii ssp. tauschii	T-group	ATAATT	1.64	32.8
L168	AS623379	Pakistan	Ae. tauschii ssp. tauschii	T-group	ATAATT	1.47	29.39
L169	AS623391	Pakistan	Ae. tauschii ssp. tauschii	T-group	ATAATT	2.52	50.48
L170	AS623065	-	Ae. tauschii ssp. tauschii	T-group	ACGATC	2.01	40.25
L171	AS623238	Afghanistan	Ae. tauschii ssp. tauschii	T-group	GTAATC	1.52	30.49
L172	AS623458	-	Ae. tauschii ssp. strangulata	T-group	ATGATC	1.81	36.13
L173	AS623365	Tajikistan	Ae. tauschii ssp. tauschii	T-group	ACAATT	1.14	22.8
L174	AS623060	Pakistan	Ae. tauschii ssp. tauschii	T-group	GTAATT	1.69	25.13
L175	AS623249	China	Ae. tauschii ssp. tauschii	T-group	GTAATT	1.83	36.5
L176	AS623390	Pakistan	Ae. tauschii ssp. tauschii	T-group	ATAGCT	1.53	30.51
L177	AS623392	Pakistan	Ae. tauschii ssp. tauschii	T-group	ATAGCT	1.5	30.03
L178	AS623348	-	Ae. tauschii ssp. tauschii	T-group	ATAGCT	1.43	28.51
L179	AS623195	Pakistan	Ae. tauschii ssp. tauschii	T-group	GCAATT	1.36	27.31
L180	AS623385	-	Ae. tauschii ssp. tauschii	T-group	ATAATT	2.11	42.18
L181	AS623422	Uzbekistan	Ae. tauschii ssp. tauschii	T-group	ATGATT	1.5	30.03
L182	AS623228	Afghanistan	Ae. tauschii ssp. tauschii	T-group	ACAATT	1.29	25.88
L183	AS623372	Pakistan	Ae. tauschii ssp. tauschii	T-group	ATAATT	2.16	43.22
L184	AS623393	-	Ae. tauschii ssp. tauschii	T-group	ACAATT	1.7	33.98
L185	AS623403	Pakistan	Ae. tauschii ssp. tauschii	T-group	GTAATT	1.27	25.41
L186	AS623371	Pakistan	Ae. tauschii ssp. tauschii	T-group	GTAATT	1.14	22.8
L187	AS623380	Pakistan	Ae. tauschii ssp. tauschii	T-group	GTAATT	1.83	36.5
L188	AS623382	-	Ae. tauschii ssp. tauschii	T-group	GTAATT	1.99	39.72
L189	AS623386	Pakistan	Ae. tauschii ssp. tauschii	T-group	ACAATT	1.67	33.34
L190	AS623194	Afghanistan	Ae. tauschii ssp. tauschii	T-group	ATAATC	1.28	25.57
L191	AS623369	Pakistan	Ae. tauschii ssp. tauschii	T-group	ACAATT	2.46	49.14
L192	AS623373	Pakistan	Ae. tauschii ssp. tauschii	T-group	ATAGCT	1.88	37.67
L193	AS623377	-	Ae. tauschii ssp. tauschii	T-group	ATAATT	1.66	33.13
L194	AS623396	Pakistan	Ae. tauschii ssp. tauschii	T-group	GTAATT	1.3	26.03
L195	AS623129	-	Ae. tauschii ssp. tauschii	T-group	ATGATC	1.83	36.5
L196	AS623368	Pakistan	Ae. tauschii ssp. tauschii	T-group	ATAATT	2.11	42.18
L197	AS623165	Pakistan	Ae. tauschii ssp. tauschii	T-group	ATAATT	1.87	37.46
L198	AS623388	Pakistan	Ae. tauschii ssp. tauschii	T-group	ATAATT	1.79	35.82
L199	AS623395	Pakistan	Ae. tauschii ssp. tauschii	T-group	ATAATT	2.72	54.48
L200	AS623414	Tajikistan	Ae. tauschii ssp. tauschii	T-group	ACGATT	2.01	40.25
L201	AS623363	Tajikistan	Ae. tauschii ssp. tauschii	T-group	ACAATT	2.49	49.83
L202	AS623419	-	Ae. tauschii ssp. tauschii	T-group	ACGATT	2.69	53.8
L203	AS623068	-	Ae. tauschii ssp. tauschii	T-group	GTAATC	1.5	30.03
L204	AS623119	Iran	Ae. tauschii ssp. tauschii	T-group	GTAATC	0.99	19.87
L205	AS623126	Afghanistan	Ae. tauschii ssp. tauschii	T-group	GTAATC	2.49	49.83
L206	AS623383	Pakistan	Ae. tauschii ssp. tauschii	T-group	GTAATT	1.52	30.48
L207	AS623401	-	Ae. tauschii ssp. tauschii	T-group	GTAATT	2.23	44.69
L208	AS623315	-	Ae. tauschii ssp. tauschii	T-group	ACGATC	1.76	35.1
L209	AS623181	-	Ae. tauschii ssp. tauschii	T-group	ACGATC	2.12	42.42
L210	AS623362	Tajikistan	Ae. tauschii ssp. tauschii	T-group	ATAATT	1.47	29.34
L211	AS623375	Pakistan	Ae. tauschii ssp. tauschii	T-group	GTAATT	1.39	27.78
L212	AS623270	Afghanistan	Ae. tauschii ssp. tauschii	T-group	ATGATT	1.76	35.07
L213	AS623360	Tajikistan	Ae. tauschii ssp. tauschii	T-group	ATGATC	2.28	45.65
L214	AS623384	Pakistan	Ae. tauschii ssp. tauschii	T-group	ATAATT	2.05	40.99
L215	AS623312	Armenia	Ae. tauschii ssp. tauschii	T-group	ACGATT	1.5	30.03
L216	AS623378	Pakistan	Ae. tauschii ssp. tauschii	T-group	ATAGCT	1.24	24.7
L217	AS623408	Uzbekistan	Ae. tauschii ssp. tauschii	T-group	ATGATT	1.78	35.56
L218	AS623231	Afghanistan	Ae. tauschii ssp. tauschii	T-group	ATAATT	1.83	36.5
L219	AS623413	Tajikistan	Ae. tauschii ssp. tauschii	T-group	ACAATC	2.14	42.79
L220	AS623230	Afghanistan	Ae. tauschii ssp. tauschii	T-group	ATAATT	1.9	38.03
L221	AS623199	Afghanistan	Ae. tauschii ssp. tauschii	T-group	ATAATT	1.35	26.96
L222	AS623135	-	Ae. tauschii ssp. tauschii	T-group	ATAATC	2.54	50.89
L223	AS623161	Afghanistan	Ae. tauschii ssp. tauschii	T-group	ATAATT	1.66	33.14
L224	AS623352	Uzbekistan	Ae. tauschii ssp. tauschii	T-group	ATAATT	2.12	42.47
L225	AS623361	Tajikistan	Ae. tauschii ssp. tauschii	T-group	ATAATT	1.49	29.72
L226	AS623200	Afghanistan	Ae. tauschii ssp. tauschii	T-group	ATAATC	1.59	31.71
L227	AS623081	Afghanistan	Ae. tauschii ssp. tauschii	T-group	ATAATC	2.01	40.25
L228	AS623268	Afghanistan	Ae. tauschii ssp. tauschii	T-group	ACGATC	2.12	42.47
L229	AS623426	-	Ae. tauschii ssp. tauschii	T-group	ATGATT	2.3	46.03
L230	AS623412	-	Ae. tauschii ssp. tauschii	T-group	ATAATC	2.06	41.26
L231	AS623121	Afghanistan	Ae. tauschii ssp. tauschii	T-group	GCAGCT	1.14	22.73
L232	AS623123	Afghanistan	Ae. tauschii ssp. tauschii	T-group	GCAGCT	2.18	43.58
L233	AS623354	Uzbekistan	Ae. tauschii ssp. tauschii	T-group	GCAGCT	1.76	35.14
L234	AS623130	Afghanistan	Ae. tauschii ssp. tauschii	T-group	ATAATC	2.13	42.53
L235	AS623084	Afghanistan	Ae. tauschii ssp. tauschii	T-group	ATAATT	2.31	46.18
L236	AS623418	Uzbekistan	Ae. tauschii ssp. tauschii	T-group	GTGGCT	1.19	23.72
L237	AS623407	-	Ae. tauschii ssp. tauschii	T-group	ACGATC	1.78	35.55
L238	AS623409	Uzbekistan	Ae. tauschii ssp. tauschii	T-group	ATAATC	2.1	41.88
L239	AS623410	Uzbekistan	Ae. tauschii ssp. tauschii	T-group	ATAATT	2.37	47.41
L240	AS623355	Uzbekistan	Ae. tauschii ssp. tauschii	T-group	ATAATC	1.63	32.54
L241	AS623237	Afghanistan	Ae. tauschii ssp. tauschii	T-group	ATAATT	0.95	19.04
L242	AS623359	Kazakhstan	Ae. tauschii ssp. tauschii	T-group	ACGATC	2.88	57.66
L243	AS623124	Afghanistan	Ae. tauschii ssp. tauschii	T-group	ACAATC	1.92	38.48
L244	AS623417	Uzbekistan	Ae. tauschii ssp. tauschii	T-group	GCAATT	2.51	50.25
L245	AS623083	Afghanistan	Ae. tauschii ssp. tauschii	T-group	ATAATT	1.9	38.1
L246	AS623189	Afghanistan	Ae. tauschii ssp. tauschii	T-group	ACAATC	1.46	29.22
L247	AS623133	Afghanistan	Ae. tauschii ssp. tauschii	T-group	GTAATC	2.04	40.74
L248	AS623495	-	Ae. tauschii ssp. tauschii	T-group	ATAATT	1.07	21.47
L249	AS623416	Tajikistan	Ae. tauschii ssp. tauschii	T-group	ATGGCT	1.85	36.95
L250	AS623351	Uzbekistan	Ae. tauschii ssp. tauschii	T-group	ATAATC	0.89	17.67
L251	AS623236	Afghanistan	Ae. tauschii ssp. tauschii	T-group	ATAATT	1.01	20.26
L252	AS623085	Afghanistan	Ae. tauschii ssp. tauschii	T-group	ATAGCT	1.58	31.5
L253	AS623047	-	Ae. tauschii ssp. tauschii	T-group	ACGATT	2.11	42.18
L254	AS623008	Iran	Ae. tauschii ssp. tauschii	T-group	GTAGCT	1.64	32.71
L255	AS623225	-	Ae. tauschii ssp. tauschii	T-group	ACAATC	1.49	29.87
L256	AS623002	France	Ae. tauschii ssp. tauschii	T-group	ACAATC	1.56	31.19
L257	AS623035	-	Ae. tauschii ssp. tauschii	T-group	ACAATC	2.82	56.49
L258	AS623275	-	Ae. tauschii ssp. tauschii	T-group	ACAATC	2.58	51.58
L259	AS623010	China	Ae. tauschii ssp. tauschii	T-group	GTAGCT	1.99	39.72
L260	AS623030	-	Ae. tauschii ssp. tauschii	T-group	GTAGCT	1.83	36.64
L261	AS623233	Turkey	Ae. tauschii ssp. tauschii	T-group	ATAATC	2.08	41.71
L262	AS623005	-	Ae. tauschii ssp. tauschii	T-group	GTAGCT	1.52	30.49
L263	AS623009	-	Ae. tauschii ssp. tauschii	T-group	GTAGCT	2.38	47.55
L264	AS623023	China	Ae. tauschii ssp. tauschii	T-group	GTAGCT	1.4	28.04
L265	AS623026	-	Ae. tauschii ssp. tauschii	T-group	GTAGCT	1.35	26.95
L266	AS623028	China	Ae. tauschii ssp. tauschii	T-group	GTAGCT	1.82	36.37
L267	AS623029	China	Ae. tauschii ssp. tauschii	T-group	GTAGCT	1.31	26.09
L268	AS623031	-	Ae. tauschii ssp. tauschii	T-group	GTAGCT	1.48	29.52
L269	AS623074	Afghanistan	Ae. tauschii ssp. tauschii	T-group	GTAGCT	1.31	26.18
L270	AS623076	Afghanistan	Ae. tauschii ssp. tauschii	T-group	GTAGCT	1	20.03
L271	AS623077	Afghanistan	Ae. tauschii ssp. tauschii	T-group	GTAGCT	1.54	30.76
L272	AS623078	Afghanistan	Ae. tauschii ssp. tauschii	T-group	GTAGCT	1.99	39.81
L273	AS623171	Afghanistan	Ae. tauschii ssp. tauschii	T-group	GTAGCT	1.61	32.13
L274	AS623229	Afghanistan	Ae. tauschii ssp. tauschii	T-group	ATAATC	1.54	30.8
L275	AS623182	-	Ae. tauschii ssp. tauschii	T-group	GCAGCC	2.57	51.35
L276	AS623266	China	Ae. tauschii ssp. tauschii	T-group	GTAGCT	1.19	23.7
L277	AS623248	China	Ae. tauschii ssp. tauschii	T-group	GTAGCT	1.06	21.26
L278	AS623016	China	Ae. tauschii ssp. tauschii	T-group	GTAGCT	1.7	33.91
L279	AS623018	China	Ae. tauschii ssp. tauschii	T-group	GTAGCT	1.51	30.09
L280	AS623019	China	Ae. tauschii ssp. tauschii	T-group	GTAGCT	1.64	32.85
L281	AS623020	China	Ae. tauschii ssp. tauschii	T-group	GTAGCT	1.78	35.51
L282	AS623059	Pakistan	Ae. tauschii ssp. tauschii	T-group	GTAGCT	1.56	31.23
L283	AS623265	China	Ae. tauschii ssp. tauschii	T-group	GTAGCT	1.4	27.87
L284	AS623038	-	Ae. tauschii ssp. tauschii	T-group	GTAGCT	1.37	27.41
L285	AS623039	-	Ae. tauschii ssp. tauschii	T-group	GTAGCT	1.95	38.88
L286	AS623017	China	Ae. tauschii ssp. tauschii	T-group	GTAGCT	2.02	40.33
"-" data unavailable.
Haplotype analysis based on single nucleotide polymorphisms significantly associated with Fusarium crown rot resistance.
Fusarium crown rot severity and disease index phenotypic data are based on the best linear unbiased prediction values.
