# Supplementary material for: Genome-wide association mapping of Fusarium crown rot resistance in Aegilops tauschii
Source: Front Plant Sci. 2022 Sep 30;13:998622. doi: 10.3389/fpls.2022.998622 (PMC9562832; doi:10.3389/fpls.2022.998622)
Supplement: Supplementary Table 2 — Haplotype analysis based on single nucleotide polymorphisms significantly associated with Fusarium crown rot (FCR) resistance. [file Table_2.XLSX]

## Sheet: Sheet1
Table S2 Haplotype analysis based on single nucleotide polymorphisms significantly associated with Fusarium crown rot (FCR) resistance.
Haplotype	Superior allele number	Accession number	Minimun	Maximum	Mean	Standard deviation	Coefficient of variation (%)	Significance
ACGATC	0	107	20.0358	57.6594	38.4966	7.68401	19.9602	a
ATGATC	1	20	18.0929	56.4866	37.0946	8.37173	22.5686	ab
ACAATC	1	24	27.6851	56.4866	36.7241	8.30326	22.6099	ab
ATAATC	2	19	17.672	50.8912	36.1212	8.05978	22.3131	ab
ATAATT	3	28	19.0438	54.4819	36.0306	8.61289	23.9044	b
GTAATT	4	11	22.7996	44.6949	32.0628	6.90207	21.5268	bc
GTAGCT	6	26	20.0312	47.5514	31.7704	6.27955	19.7655	c
The different lowercase letters between haplotypes denote FCR resistance were significant (P <0.05) differences.
