# Supplementary material for: Genome-wide association mapping of Fusarium crown rot resistance in Aegilops tauschii
Source: Front Plant Sci. 2022 Sep 30;13:998622. doi: 10.3389/fpls.2022.998622 (PMC9562832; doi:10.3389/fpls.2022.998622)
Supplement: Supplementary Table 3 — Detail information of predicted genes flanking significant markers associated with Fusarium crown rot resistance. [file Table_3.xlsx]

## Sheet: Table S3
Table S3 Detail information of predicted genes flanking significant markers associated with Fusarium crown rot resistance.
Aegilops tauschii gene	Significant marker	Arabidopsis gene	Known gene name in Arabidopsis	Gene description
AET2Gv20438700	GB5Y7FA01DPZQ3	-	-	Major facilitator superfamily protein
AET2Gv20438900		AT4G05120	AtFUR1	Octicosapeptide/Phox/Bem1p family protein
AET2Gv20439000		AT4G05150	-	Octicosapeptide/Phox/Bem1p family protein
AET2Gv20439100		AT4G03280	AtPETC	photosynthetic electron transfer C
AET2Gv20439300		AT1G71860	AtPTP1	protein tyrosine phosphatase 1
AET2Gv20439700		AT2G45280	AtRAD51C	RAS associated with diabetes protein 51C
AET2Gv21053400	GA8KES401CURCG	AT5G59310	AtLTP4	lipid transfer protein 4
AET2Gv21054000		AT3G42170	AtDAYSLEEPER	BED zinc finger and hAT dimerization domain-containing protein DAYSLEEPER
AET2Gv21054100		AT2G14170	AtALDH6B2	aldehyde dehydrogenase 6B2
AET2Gv21054300		AT3G04380	AtSUVR4	SET-domain containing protein lysine methyltransferase family protein
AET2Gv21054400		AT1G31840	-	Tetratricopeptide repeat (TPR)-like superfamily protein
AET2Gv21054500		AT1G61680	AtTPS14	terpene synthase 14
AET2Gv21054600		AT3G20720	-	amino-terminal region of chorein
AET2Gv21054700		AT5G47550	-	Cystatin/monellin superfamily protein
AET2Gv21054800		-	-	-
AET2Gv21054900		AT3G47000	-	Glycosyl hydrolase family protein
AET2Gv21055000		AT1G34580	-	Major facilitator superfamily protein
AET2Gv21055200		AT4G01070	AtGT72B1	UDP-Glycosyltransferase superfamily protein
AET2Gv21055300		AT3G04380	AtSUVR4	SET-domain containing protein lysine methyltransferase family protein
AET2Gv21055500		AT3G09920	AtPIP5K9	UDP-Glycosyltransferase superfamily protein
AET2Gv21055800		AT3G21870	AtCYCP2;1	cyclin p2;1
AET2Gv21056000		AT3G21865	AtPEX22	peroxin 22
AET2Gv21056200		AT3G48770	-	ATP/DNA binding protein
AET2Gv21056400		-	-	-
AET2Gv21056500		AT3G21820	AtATXR2	histone-lysine N-methyltransferase ATXR2
AET7Gv21152400	GDRF1KQ02F6UYY	AT1G56600	AtGolS2	galactinol synthase 2
AET7Gv21152600		AT2G13770	-	nuclease
AET7Gv21152700		-	-	-
AET7Gv21153400		AT3G43700	AtBPM6	BTB-POZ and MATH domain 6
AET7Gv21153600		AT1G56150	-	SAUR-like auxin-responsive protein family
AET7Gv21153700		AT1G56150	-	SAUR-like auxin-responsive protein family
AET7Gv21153800		AT3G01410	-	Polynucleotidyl transferase, ribonuclease H-like superfamily protein
AET7Gv21154000		AT1G56150	-	SAUR-like auxin-responsive protein family
AET7Gv21154100		AT1G56150	-	SAUR-like auxin-responsive protein family
AET7Gv21253500	GBQ4KXB01BSGDP, GB5Y7FA01B2L7A	-	-	-
AET7Gv21253800		-	-	-
AET7Gv21254300		AT5G19000	AtBPM1	BTB-POZ and MATH domain 1
AET7Gv21254700		AT5G45540	-	transmembrane protein, putative (DUF594)
AET7Gv21254800		-	-	-
AET7Gv21254900		-	-	-
AET7Gv21255000		AT3G06190	AtBPM2	BTB-POZ and MATH domain 2
AET7Gv21255100		AT5G25220	AtKNAT3	homeobox protein knotted-1-like 3
AET7Gv21255300		AT3G46920	-	kinase superfamily with octicosapeptide/Phox/Bem1p domain-containing protein
ENSRNA050032692		-	-	-
ENSRNA050032687		AT3G57770	-	Protein kinase superfamily protein
ENSRNA050032689		AT3G57770	-	Protein kinase superfamily protein
AET7Gv21255700		AT5G16750	AtTOZ	Transducin family protein / WD-40 repeat family protein
ENSRNA050032688		AT3G57770	-	Protein kinase superfamily protein
ENSRNA050032686		AT3G57770	-	Protein kinase superfamily protein
AET7Gv21256200		AT2G45590	-	Protein kinase superfamily protein
ENSRNA050032683		AT3G57770	-	Protein kinase superfamily protein
ENSRNA050032690		-	-	Protein kinase superfamily protein
ENSRNA050032685		AT3G57770	-	Protein kinase superfamily protein
ENSRNA050032682		AT3G57770	-	Protein kinase superfamily protein
ENSRNA050032684		AT3G57770	-	Protein kinase superfamily protein
AET7Gv21256400		AT2G04400	-	Aldolase-type TIM barrel family protein
AET7Gv21256800		ArthMp045	-	maturase
AET7Gv21257000		-	-	-
AET7Gv21257100		-	-	-
AET7Gv21257300		AT1G61440	-	S-locus lectin protein kinase family protein
AET7Gv21257500		AT2G06500	-	hAT family dimerization domain-containing protein
AET7Gv21338600	GA8KES402HI5B7	AT5G48050	-	Copia-like polyprotein/retrotransposon
AET7Gv21338900		AT5G48050	-	Copia-like polyprotein/retrotransposon
AET7Gv21339000		AT5G41220	AtGSTT3	glutathione S-transferase THETA 3
AET7Gv21339100		-	-	-
AET7Gv21339600		AT3G22935	-	hypothetical protein
AET7Gv21339700		AT5G49410	-	thiamine-phosphate synthase
AET7Gv21339800		AT1G49050	-	Eukaryotic aspartyl protease family protein
AET7Gv21340100		AT2G04865	-	Aminotransferase-like, plant mobile domain family protein
AET7Gv21340500		-	-	-
AET7Gv21340700		-	-	-
AET7Gv21340800		-	-	-
AET7Gv21341100		-	-	-
